# Supplementary material
Source: Elsevier journal article supplement (https://www.sciencedirect.com/science/article/pii/S0212656718302142)
Supplement: mmc1 [file S0212656718302142:mmc1.docx]

**Anexo : Material complementario**

| Estrato CRG | Estrato GMA | | | | |
| --- | --- | --- | --- | --- | --- |
| A | B | C | D | E |
| A | **36.472** | 30.614 | 7.344 | 1.435 | 62 |
| B | 37.576 | **154.000** | 96.849 | 27.182 | 1.372 |
| C | 3.051 | 109.730 | **373.491** | 285.184 | 11.588 |
| D | 635 | 15.849 | 288.835 | **1.663.783** | 552.799 |
| E | 9 | 113 | 8.968 | 609.690 | **1.783.737** |

**T-1 Anexo**. Concordancia de las pirámides de riesgo entre agrupadores

Para facilitar el posterior análisis de los datos, el **cuestionario** se elaboró como un formulario de MSAcces. Se divide en tres partes:

1. **Información clínica**: edad, sexo, diagnósticos (crónicos y agudos), procedimientos y prescripción farmacéutica


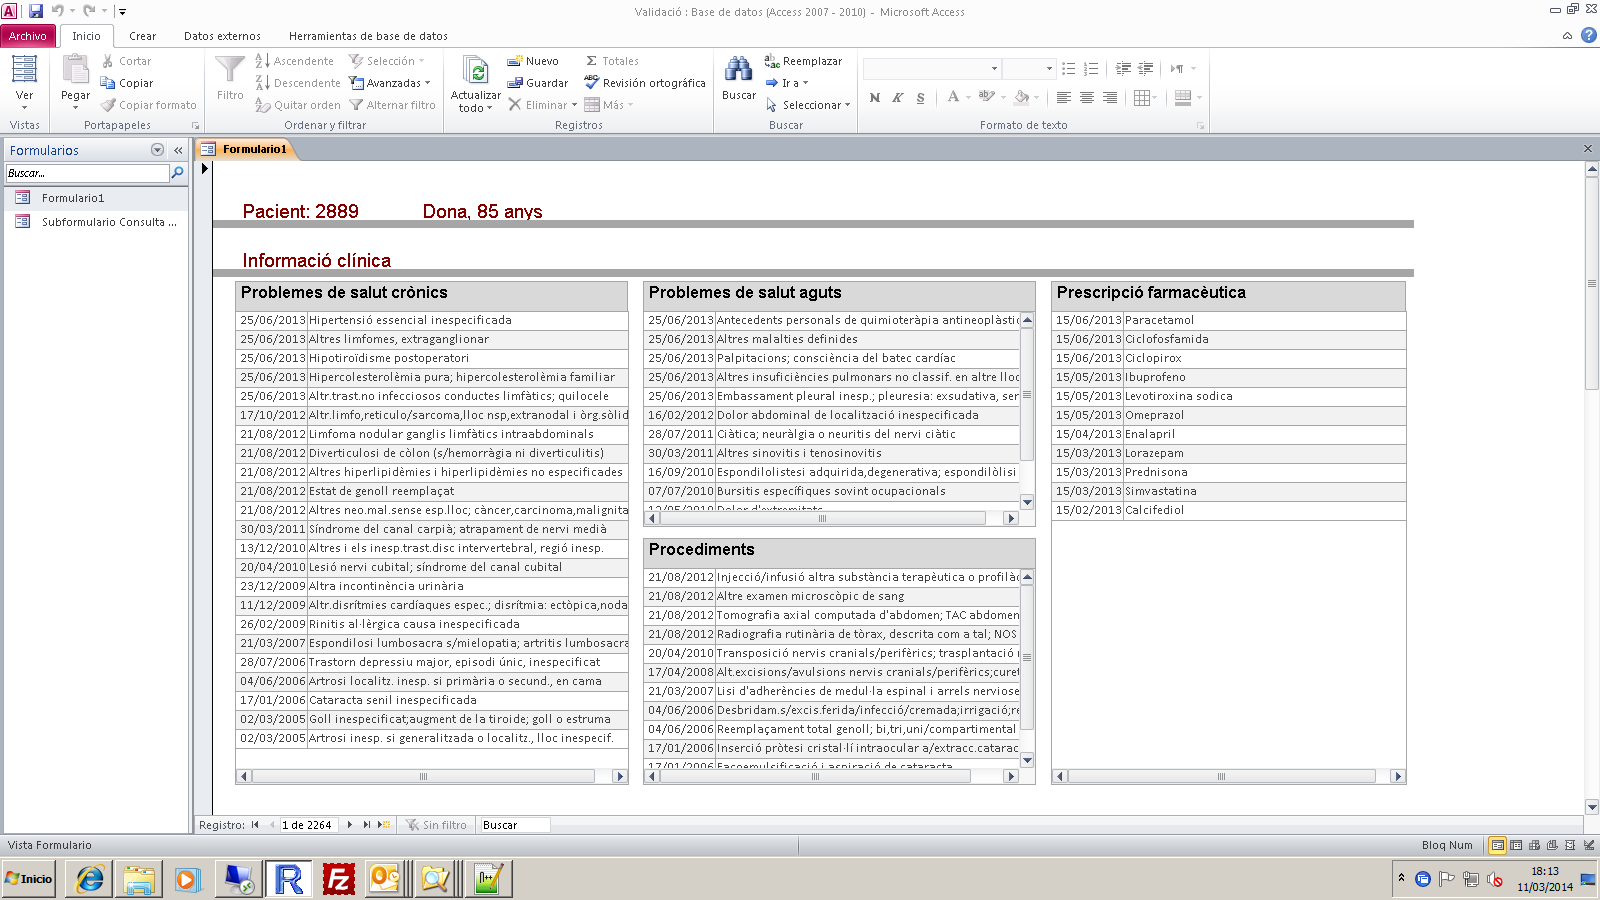


1. **Resultados de la agrupación**: con CRG (agregada y específica) y con GMA (agregada y etiqueta clínica), así como la situación del asegurado en las dos pirámides de riesgo elaboradas.


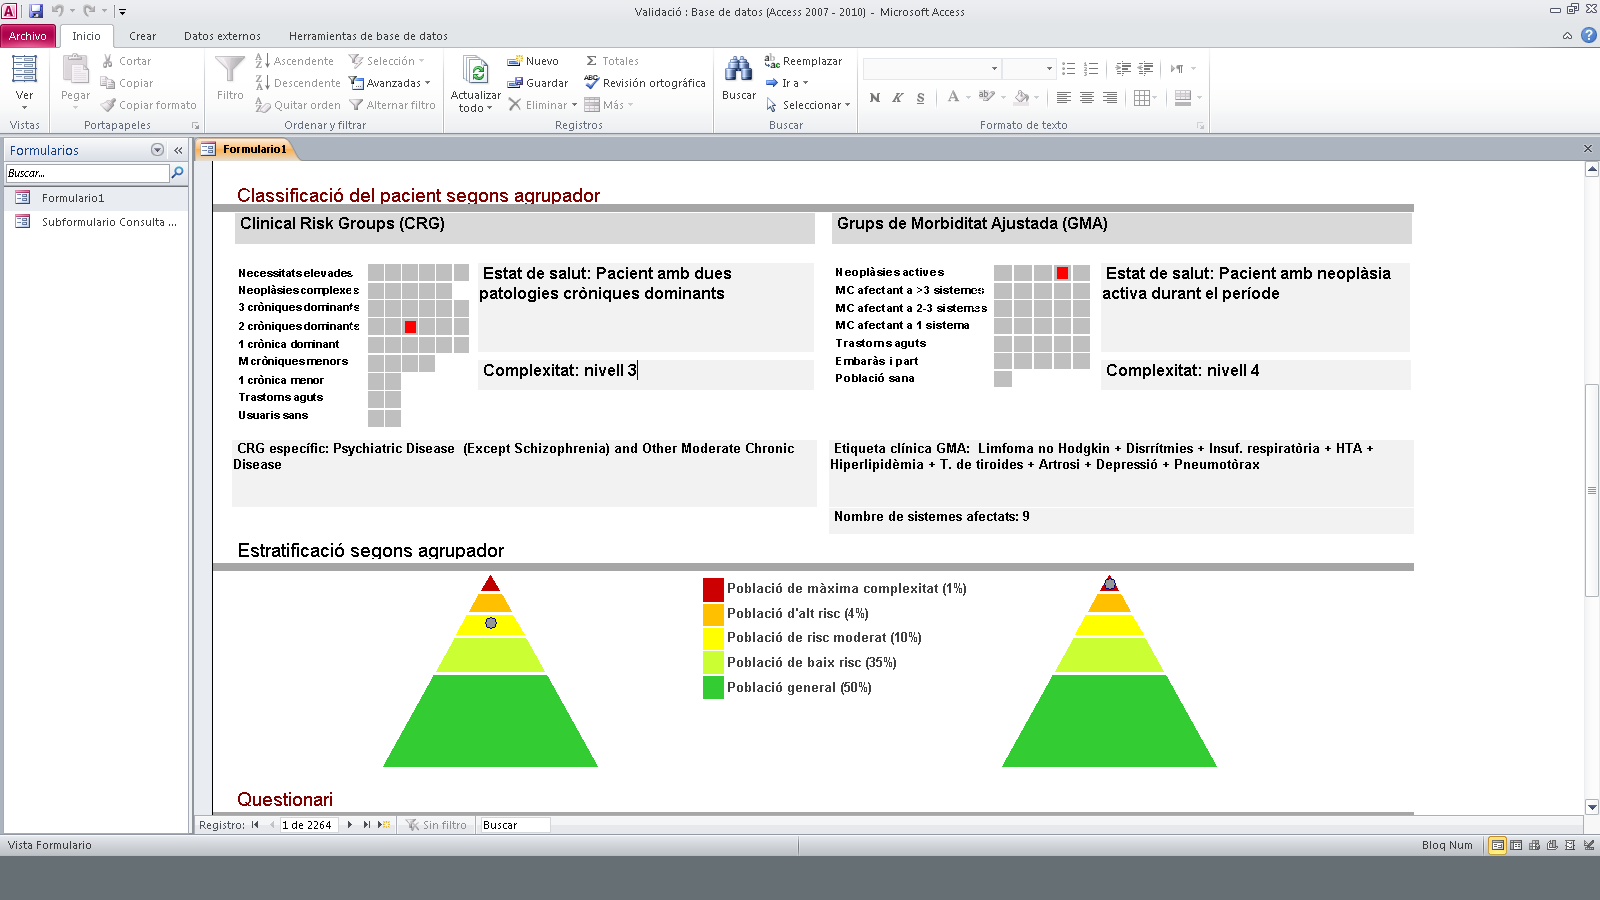


1. **Preguntas sobre la clasificación del asegurado**: (**Questionari**)
   - ¿Consideras que el paciente queda bien clasificado según CRG?
   - ¿Consideras que el paciente queda bien clasificado según GMA?
   - ¿Qué clasificación consideras más adecuada?
   - Con la información disponible, ¿qué nivel de complejidad otorgarías a este paciente?
   - En caso de preferencia por una de les clasificaciones, ¿qué informaciones te han ayudado a tomar la decisión?
     - Los diagnósticos, independientemente de la fecha
     - La fecha de los diagnósticos
     - Los procedimientos
     - La prescripción farmacéutica
     - El CRG específico
     - La etiqueta clínica de los GMA
     - El nivel de estratificación que aparece en la pirámide
     - Otros
   - Observaciones


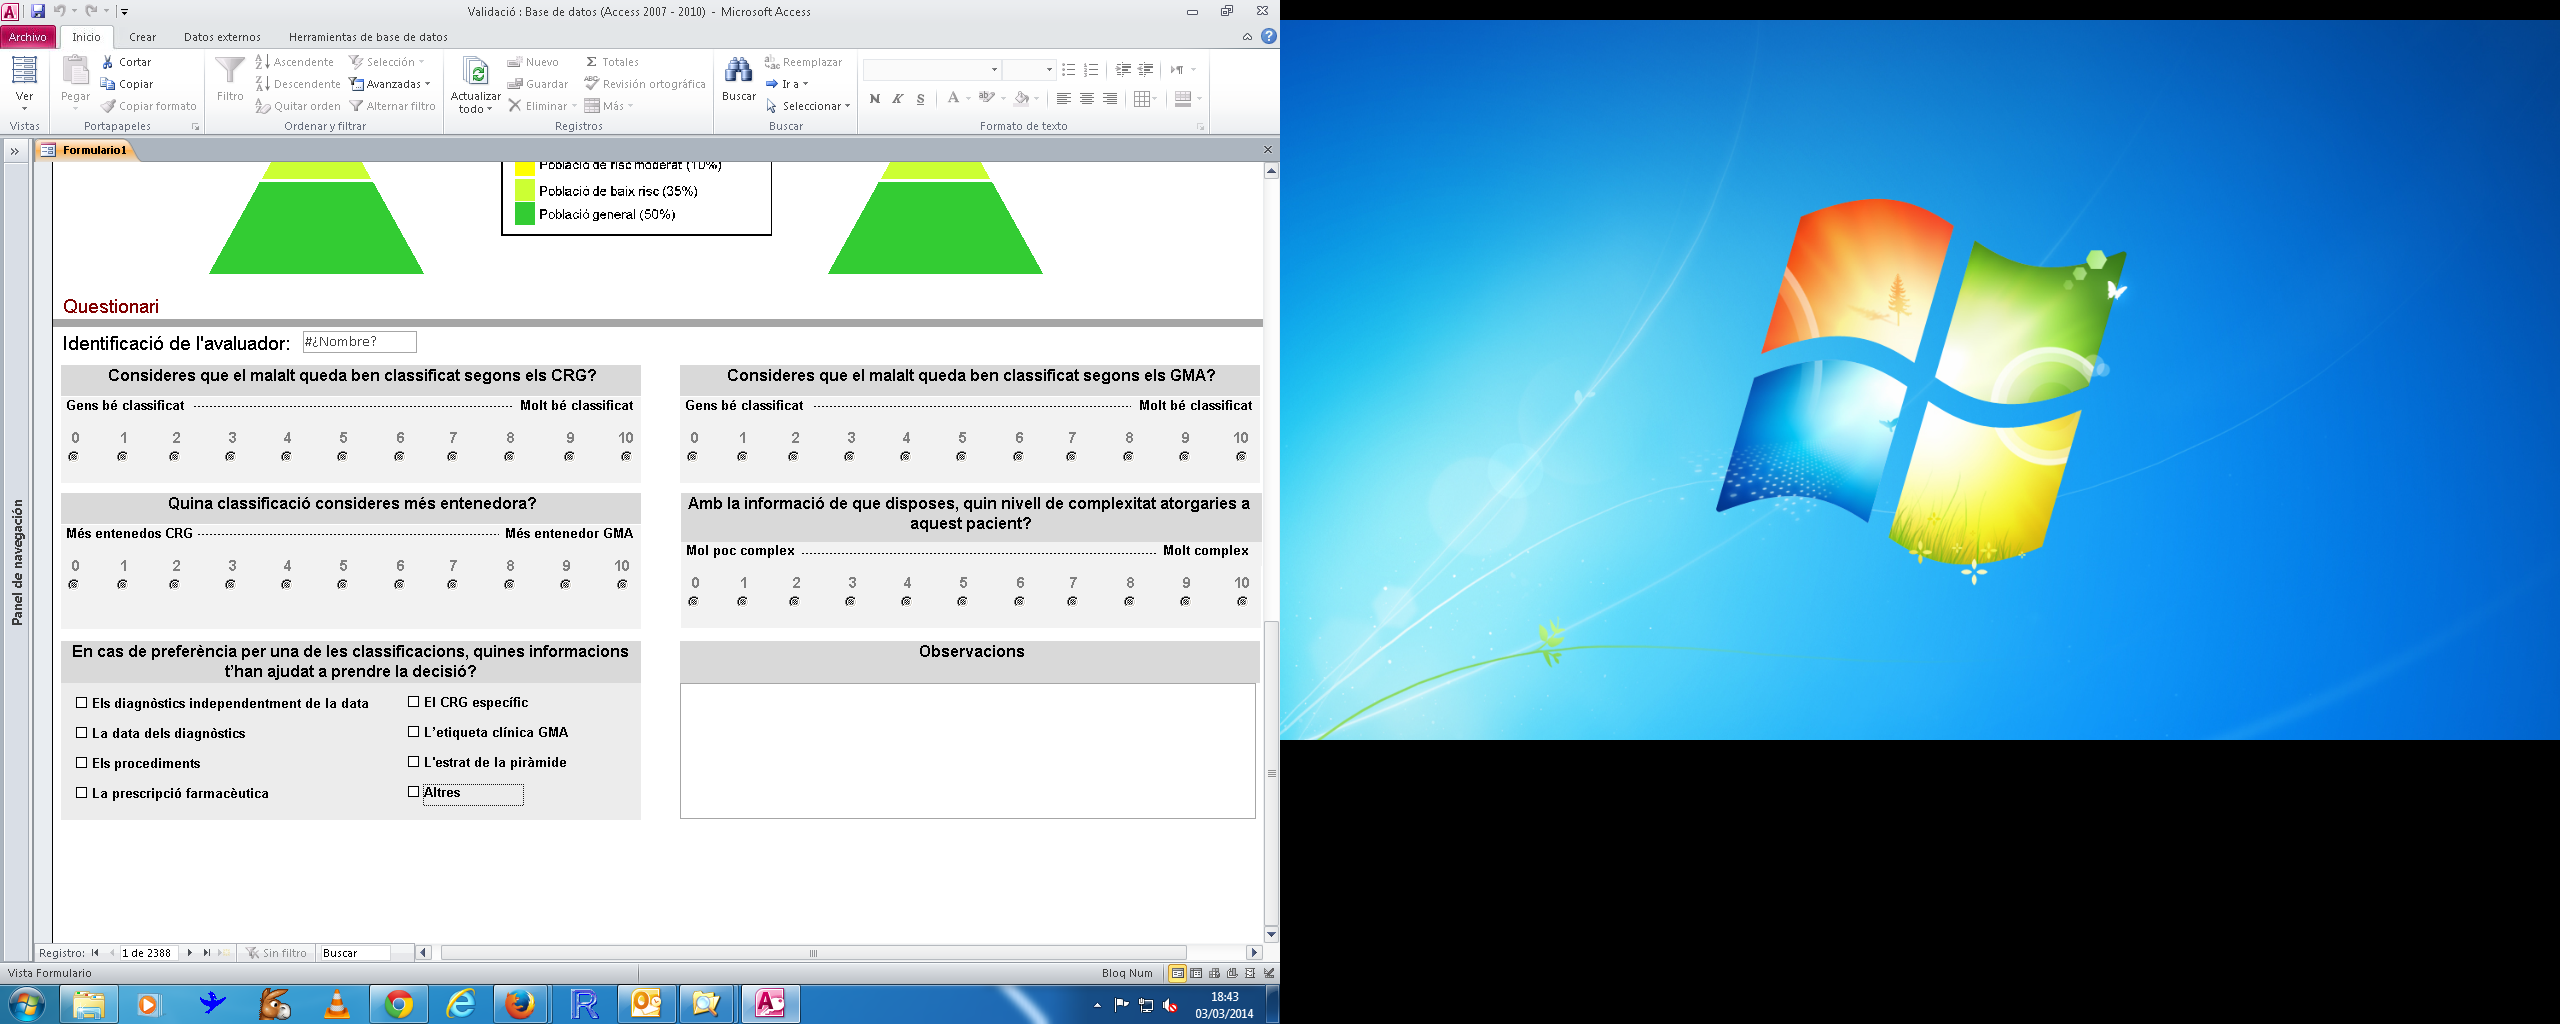


**T-2 Anexo: Cuestionario de validación (apartados A, B y C)**

| **Estrato (según criterio clínico)** | **Error clasificación del agrupador** |
| --- | --- |
| 1 Población de máxima complejidad | 3 Población de riesgo moderado  4 Población de bajo riesgo  5 Población general |
| 2 Población de alto riesgo | 4 Población de bajo riesgo  5 Población general |
| 3 Población de riesgo moderado | 1 Población de máxima complejidad  5 Población general |
| 4 Población de bajo riesgo | 1 Población de máxima complejidad  2 Población de alto riesgo |
| 5 Población general | 1 Población de máxima complejidad  2 Población de alto riesgo  3 Población de riesgo moderado |

**T- 3 Anexo**. Error de clasificación de los agrupadores según estrato de riesgo.
